# Supplementary material for: Tailoring strain construction strategies for muconic acid production in S. cerevisiae and E. coli
Source: PubMed Central journal article supplement — Metab Eng Commun. 2014 Oct 23;1:19–28. doi: 10.1016/j.meteno.2014.09.001 (PMC8193250; doi:10.1016/j.meteno.2014.09.001), 2014-10-23
Supplement: mmc4.pdf [file mmc4.pdf]

## Supplementary tables

### Supplementary table 1: Maximum yields on glucose feed

Comparison of maximum product yields of the wild type networks for the five pathways in *S. cerevisiae* and *E. coli*. Yields are the fraction of carbons in the substrate glucose (single carbon source) that end up in the product ccMA.

#### *S. cerevisiae*:

| Pathway branch | EFM count  | Max. yield [%] | Max. yield with biomass [%] |
|----------------|------------|----------------|-----------------------------|
| DHS-pathway    | 29,836,123 | 85.7           | 84.8                        |
| ANTH-pathway   | 29,567,053 | 70.4           | 65.8                        |
| DHBA-pathway   | 31,739,546 | 80             | 77.3                        |
| SA-pathway     | 29,704,354 | 72.3           | 69.8                        |
| pHBA-pathway   | 29,953,182 | 72             | 66.1                        |

#### *E. coli*:

| Pathway branch | EFM count | Max. yield [%] | Max. yield with biomass [%] |
|----------------|-----------|----------------|-----------------------------|
| DHS-pathway    | 468,715   | 85.7           | 79.45                       |
| ANTH-pathway   | 493,917   | 68.8           | 64.7                        |
| DHBA-pathway   | 482,135   | 79.4           | 75.3                        |
| SA-pathway     | 484,284   | 71.05          | 65.4                        |
| pHBA-pathway   | 506,231   | 70.6           | 67.8                        |

### Supplementary table 2: Maximum yields on glucose + glycerol co-feed

Comparison of maximum product yields of the wild type networks for the five pathways in *E. coli*. Yields are the fraction of carbons in the substrates glucose and glycerol (mixed carbon source, variable ratio) that end up in the product ccMA.

| Pathway branch | EFM count | Max. yield [%] | Max. yield with biomass [%] |
|----------------|-----------|----------------|-----------------------------|
| DHS-pathway    | 876,044   | 89.7           | 84.8                        |
| ANTH-pathway   | 938,621   | 70.4           | 65.8                        |
| DHBA-pathway   | 913,663   | 84.5           | 77.7                        |
| SA-pathway     | 926,636   | 75.65          | 69.7                        |
| pHBA-pathway   | 963,577   | 75.2           | 69.96                       |

## Supplementary tables

### Supplementary table 3: Maximum and minimum yields of *S. cerevisiae* knock-out networks

Comparison of maximum and minimum product yields of the knock-out strategies for the five pathways in *S. cerevisiae*. For the DHS-pathway only a two-target knock-out strategy that minimizes the number of low-yield-modes is shown. For the other pathways, which allow the rewiring of pyruvate metabolism, a second knock-out that can further increase the minimum yield is included. Yields are percentage carbon yields of the product in respect to the substrate glucose.

| Pathway branch | Knock-out targets | Max. yield without biomass [%] | Max. yield with biomass [%] | Min. yield without biomass [%] | Min. yield with biomass [%] |
|----------------|-------------------|--------------------------------|-----------------------------|--------------------------------|-----------------------------|
| DHS-pathway    | G6PD GPDH         | 85.7                           | 84.8                        | 0                              | 0                           |
| ANTH-pathway   | PYK<br>PYK GPDH   | 70.4                           | 65.8                        | 28.4<br>54.5                   | 29.5<br>46.9                |
| DHBA-pathway   | PYK<br>PYK GPDH   | 80                             | 77.3                        | 25.3<br>57.1                   | 26.2<br>46.9                |
| SA-pathway     | PYK<br>PYK GPDH   | 72.3                           | 69.8                        | 31.6<br>57.1                   | 32.9<br>49.6                |
| pHBA-pathway   | PYK<br>PYK GPDH   | 72                             | 66.1                        | 27.5<br>54.5                   | 29<br>46.4                  |

## Supplementary tables

### Supplementary table 4: Maximum and minimum yields of *E. coli* knock-out networks

Comparison of maximum product yields of the knock-out strategies for the five pathways in *E. coli*. For the ANTH-pathway two alternate knock-out strategies are shown, while for the DHBA-, SA- and pHBA-pathways only the more rational strategy based on rewiring pyruvate metabolism is shown. Yields are percentage carbon yields of the product in respect to the substrate glucose.

| Pathway branch | Knock-out targets   | Max. yield without biomass [%] | Max. yield with biomass [%] | Min. yield without biomass [%] | Min. yield with biomass [%] |
|----------------|---------------------|--------------------------------|-----------------------------|--------------------------------|-----------------------------|
| DHS-pathway    | GPI PGD PGM/PGH     | 75                             | 74.9                        | 75                             | 71.6                        |
|                | GPI PGD GAP/PGK     |                                | 74.97                       |                                | 73.3                        |
| ANTH-pathway   | GPI TAL PGM/PGH     | 50                             | 49.8                        | 50                             | 44.9                        |
|                | GPI TAL GAP/PGK     |                                | 49.9                        |                                | 47.5                        |
|                | PTS PYK EDA MAE     | 68.3                           | 64.7                        | 8.8                            | 5.2                         |
|                | PTS PYK EDA MAE FRD |                                | 25                          | 25.8                           |                             |
| DHBA-pathway   | PTS PYK EDA MAE     | 78.1                           | 75.3                        | 9.1                            | 6.3                         |
|                | PTS PYK EDA MAE FRD |                                | 25                          | 25.8                           |                             |
| SA-pathway     | PTS PYK EDA MAE     | 70.4                           | 61.6                        | 9.1                            | 5.5                         |
|                | PTS PYK EDA MAE FRD |                                | 25                          | 25.8                           |                             |
| pHBA-pathway   | PTS PYK EDA MAE     | 69.9                           | 62.2                        | 9.1                            | 5.5                         |
|                | PTS PYK EDA MAE FRD |                                | 25                          | 25.8                           |                             |

## Supplementary tables

### Supplementary table 5: Comparison of knock-out targets

Corresponding enzymes and coding genes for each knock-out target and organism are stated in the table below. This is meant to serve a better understanding of the manuscript as a knock-out target determined in the analysis is always a specific function / reaction, rather than a single gene. This may also aid in determining the experimental effort when comparing the knock-out strategies.

| <i>S. cerevisiae</i> knock-out target                  | Gene(s)           | <i>E. coli</i> knock-out target                             | Gene(s)                                                              |
|--------------------------------------------------------|-------------------|-------------------------------------------------------------|----------------------------------------------------------------------|
| GPDH glycerol-3-phosphate dehydrogenase (two isozymes) | <i>GPD1/GPD2</i>  | PTS phosphotransferase system (multi-component system)      | npr/ptsO/rpoR/yhbK<br>ptsH/hpr/Hpr/ctr<br>ptsI/ctr<br>ptsP/ygdF/ygdO |
| PYK pyruvate kinase (two isozymes)                     | <i>CDC19/PYK2</i> | PYK pyruvate kinase (two isozymes)                          | pykA<br>pykF                                                         |
| G6PD glucose-6-phosphate 1-dehydrogenase               | <i>ZWF1</i>       | FRD fumarate reductase (four separately expressed subunits) | frdA, frdB, frdC,<br>frdD                                            |
|                                                        |                   | EDA 2-dehydro-3-deoxy-phosphogluconate aldolase             | eda/hga/kdgA/kga                                                     |
|                                                        |                   | MAE malic enzyme (NADP & NAD dependent enzymes)             | maeB/ypfF<br>sfcA/maeA/mae                                           |
|                                                        |                   | GPI glucose-6-phosphate isomerase                           | pgi                                                                  |
|                                                        |                   | PGD phosphogluconate dehydrogenase                          | gnd                                                                  |
|                                                        |                   | TAL transaldolase                                           | talB                                                                 |
|                                                        |                   | PGM phosphoglycerate mutase (two enzymes)                   | gpmA/gpmM                                                            |
|                                                        |                   | ENO phosphopyruvate hydratase                               | eno                                                                  |
|                                                        |                   | GAPDH glyceraldehyde-3-phosphate dehydrogenase              | gapA                                                                 |
|                                                        |                   | PGK phosphoglycerate kinase                                 | pgk                                                                  |

## Supplementary figures

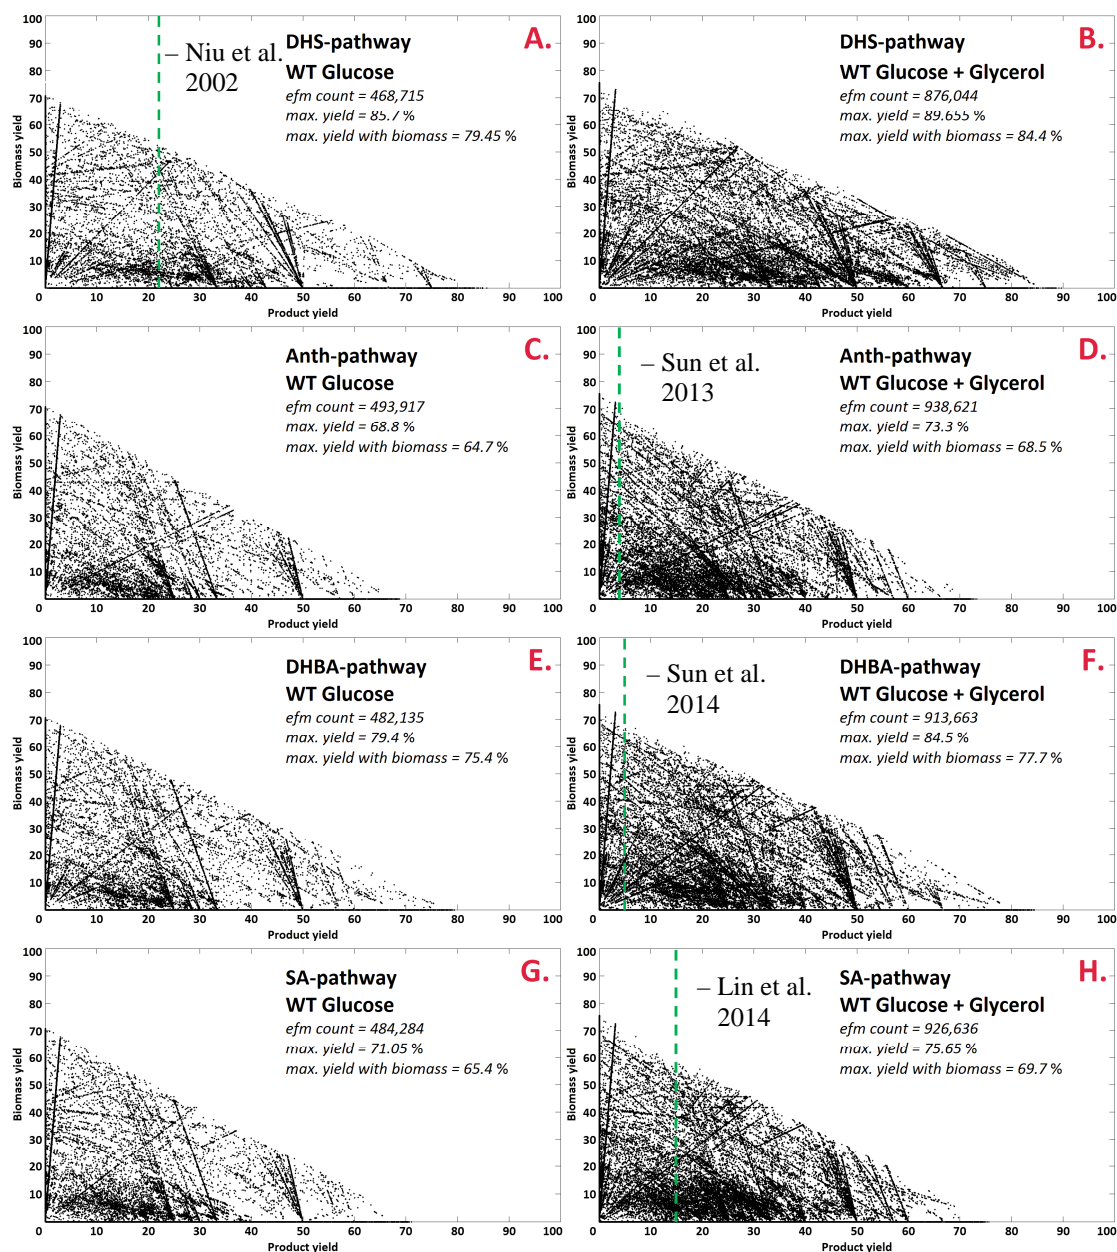

### Supplementary figure 5 – EM distribution *E. coli* Glucose + Glycerol co-feed

Product vs. biomass yield plots of the EFM distribution of *E. coli* WT networks. This figure is supposed to serve a better comparability of the different yields achieved by the two groups that derived ccMA from the two different branches of shikimate pathway in *E. coli* on different carbon sources. Key data is indicated on the charts. Each point in a chart corresponds to the specific product and biomass yield of the respective elementary flux mode. Yields are carbon yields in %. A green dashed vertical line indicates currently achieved product yields in the respective approaches.

## Supplementary figures

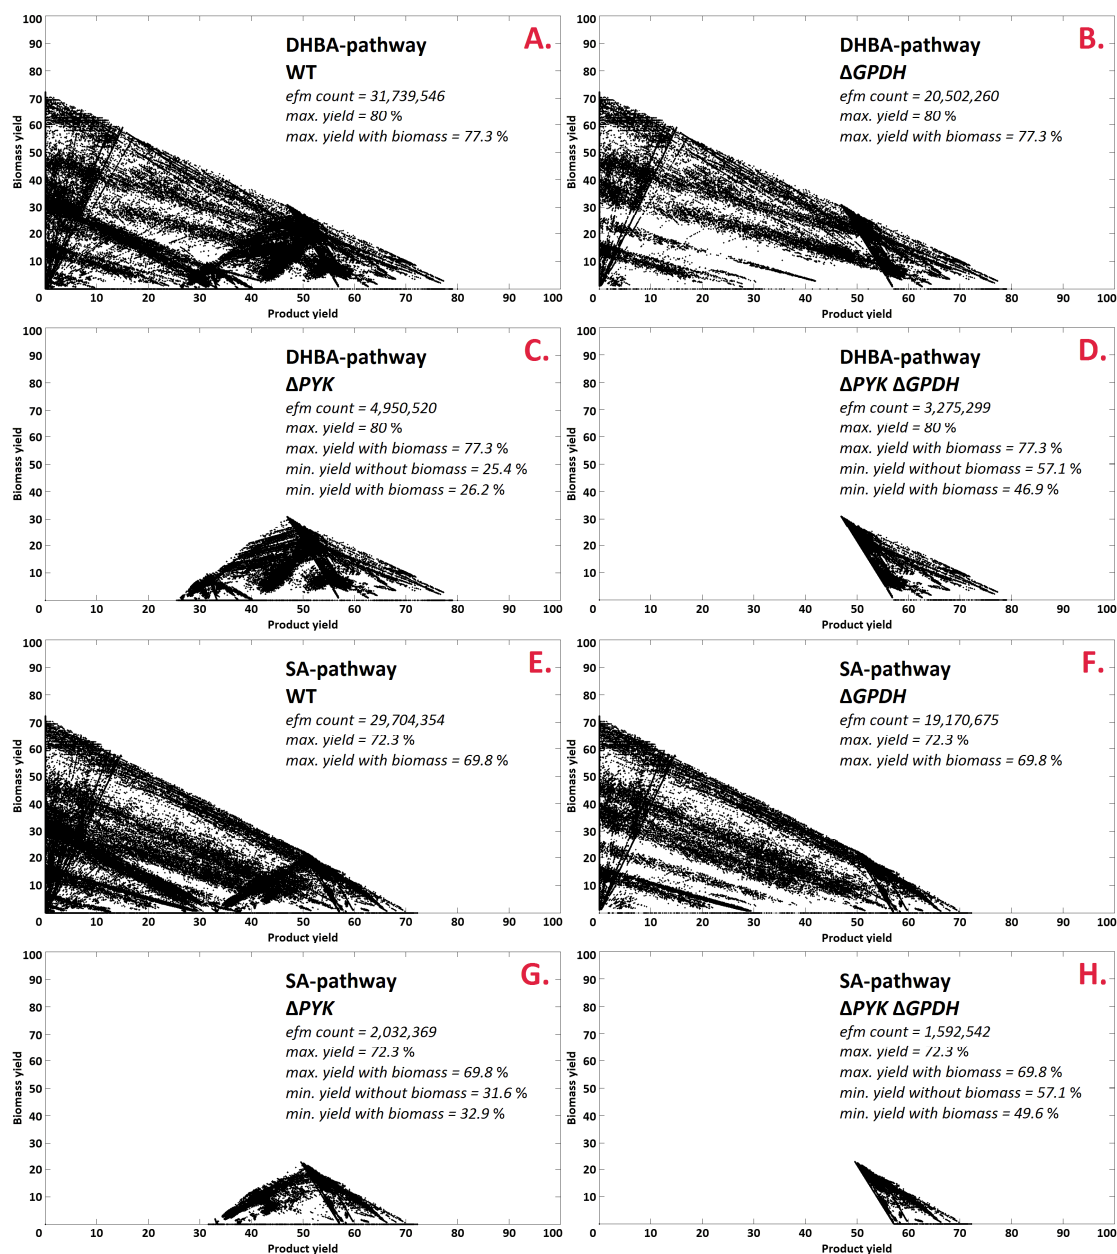

### Supplementary figure 6 – Yield vs. biomass plots of knock-out strategies for *S. cerevisiae*

Product vs. biomass yield plots of the EFM distribution of isochorismate derived routes in *S. cerevisiae* networks. For each pathway four scenarios are shown, comparing the wild type with the determined knock-out metabolism. Key data as well as respective knock-outs are indicated on the charts. Each point in a chart corresponds to the specific product and biomass yield of the respective elementary flux mode. Yields are carbon yields in %.

## Supplementary figures

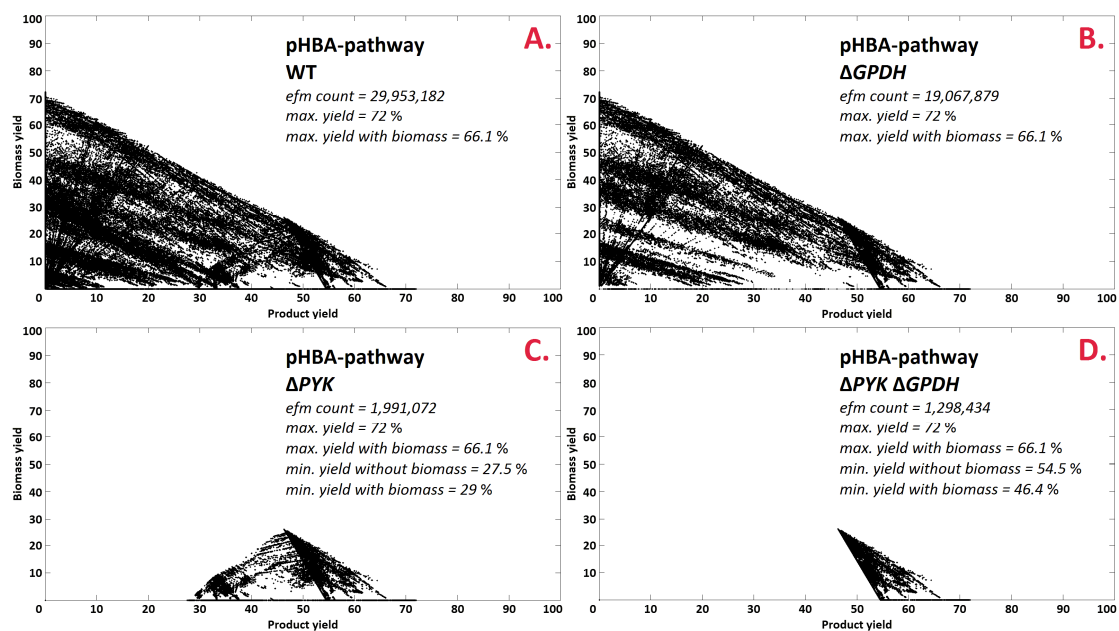

### Supplementary figure 7 – Yield vs. biomass plots of knock-out strategies for *S. cerevisiae*

Product vs. biomass yield plots of the EFM distribution of the pHBA-pathway in *S. cerevisiae* networks. For each pathway four scenarios are shown, comparing the wild type with the determined knock-out metabolism. Key data as well as respective knock-outs are indicated on the charts. Each point in a chart corresponds to the specific product and biomass yield of the respective elementary flux mode. Yields are carbon yields in %.

## Supplementary figures

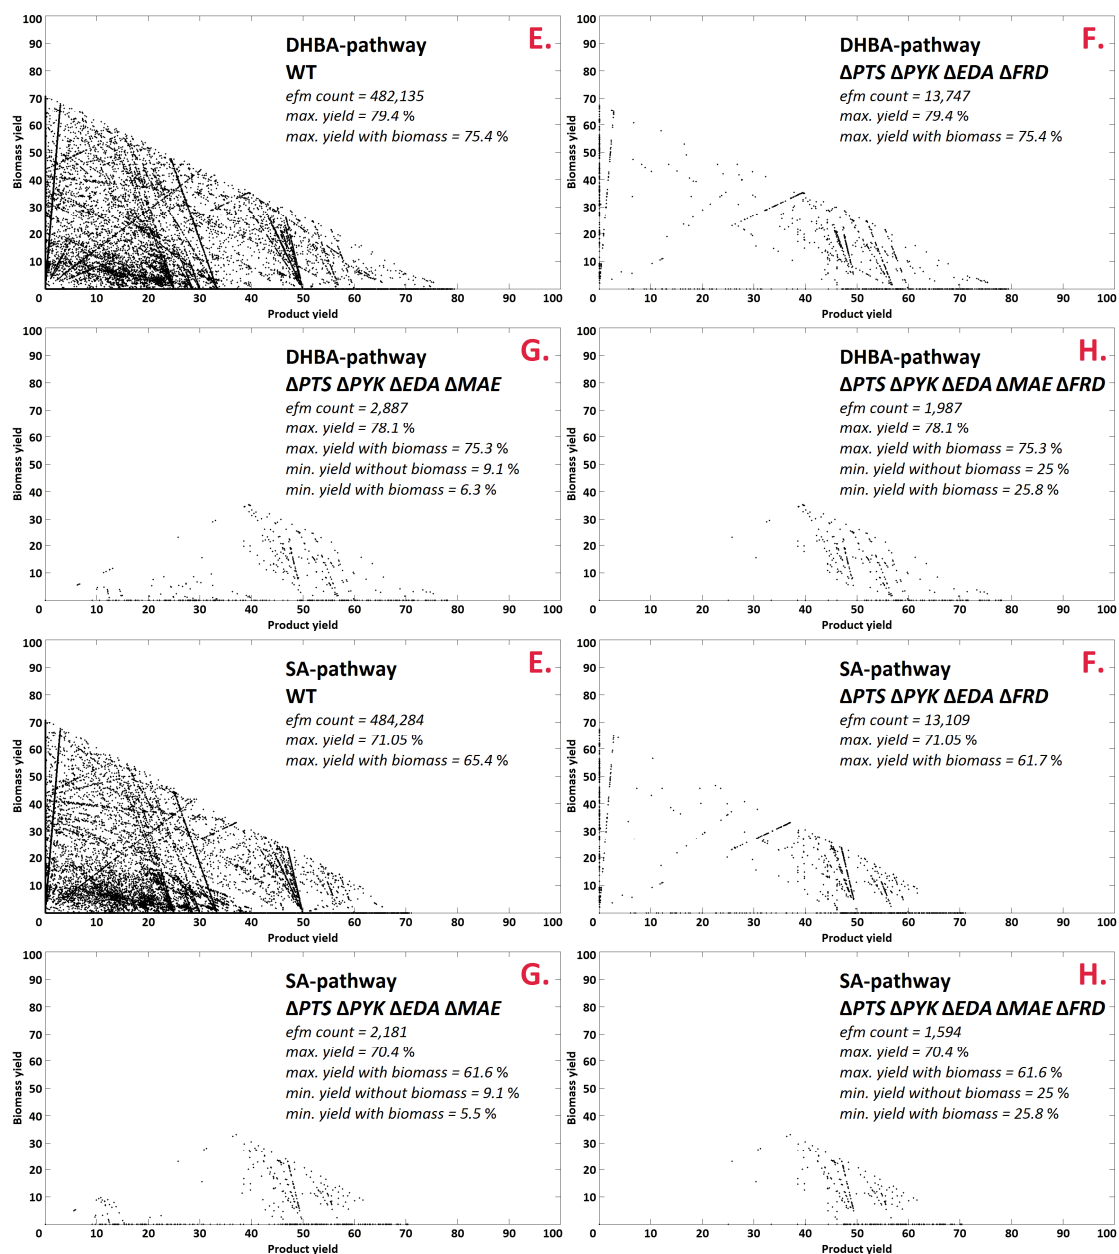

### Supplementary figure 8 – Yield vs. biomass plots of alternative knock-out strategy for *E. coli*

Product vs. biomass yield plots of the EFM distribution of isochorismate derived routes in *E. coli* networks. Four scenarios are shown, comparing the wild type with the determined knock-out metabolism. Key data as well as respective knock-outs are indicated on the charts. Each point in a chart corresponds to the specific product and biomass yield of the respective elementary flux mode. Yields are carbon yields in %.



## Supplementary figures

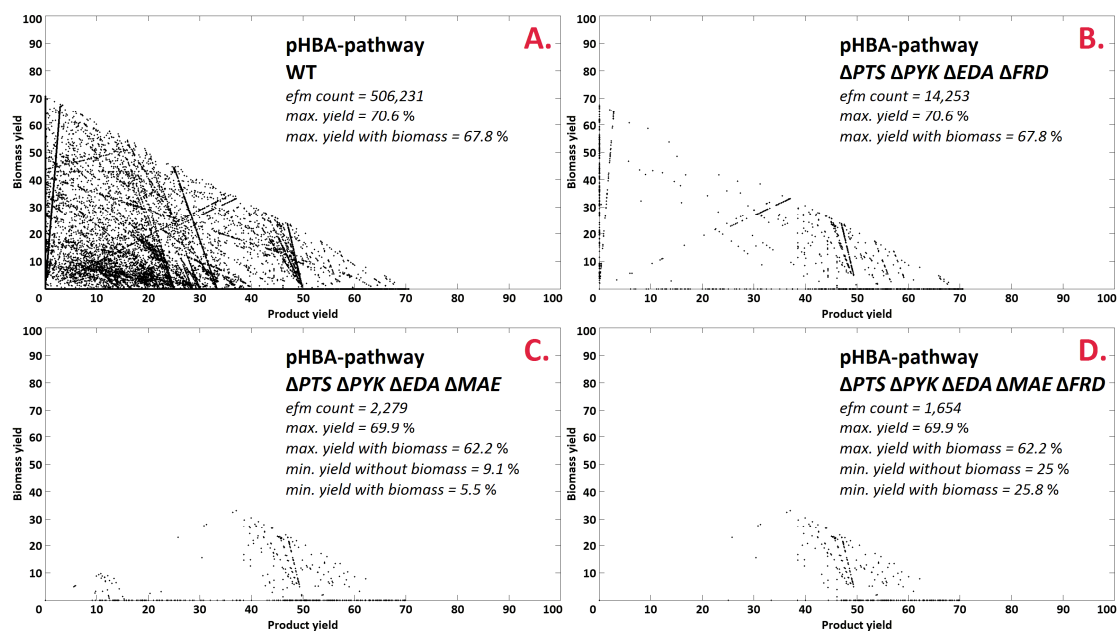

### Supplementary figure 9 – Yield vs. biomass plots of alternative knock-out strategy for *E. coli*

Product vs. biomass yield plots of the EFM distribution of the pHBA-pathway in *E. coli* networks. Four scenarios are shown, comparing the wild type with the determined knock-out metabolism. Key data as well as respective knock-outs are indicated on the charts. Each point in a chart corresponds to the specific product and biomass yield of the respective elementary flux mode. Yields are carbon yields in %.
